# Supplementary material for: A Chimeric UDP-Glucose Pyrophosphorylase Produced by Protein Engineering Exhibits Sensitivity to Allosteric Regulators
Source: PubMed Central journal article supplement (PMC3676807; doi:10.3390/ijms14059703), 2013-05-06
Supplement: ijms-14-09703-s001.pdf [file ijms-14-09703-s001.pdf]

## Supplementary Information

**Figure S1.** Alignment between different ADP-Glc PPases and UDP-Glc PPases Schematic, used in Panel A of Figure 1. (Ref: *Solanum*: ADP-Glc PPase small subunit from potato; *AtuGlgC*, *A. tumefaciens* ADP-Glc PPase; *EcoGlgC*, *E. coli* ADP-Glc PPase; Chimera, chimeric *SmuGalU*- $\Delta$ 294*EcoGlgC*; *SmuGalU*, *S. mutans* UDP-Glc PPase; *HpyGalU*, *H. pylori* UDP-Glc PPase; *CglGalU*, *C. glutamicum* UDP-Glc PPase). The amino acidic residue P<sup>295</sup> indicating the beginning of the *E. coli* ADP-Glc PPase C-term domain is over-marked.

|                |       |                                                                         |
|----------------|-------|-------------------------------------------------------------------------|
|                |       | ..... ..... ..... ..... ..... ..... ..... ..... ..... ..... ..... ..... |
|                |       | 10      20      30      40      50      60                              |
| <i>Solanum</i> | (1)   | -----QTCLDPDASRSVLSGIIILGGGAGTRLYPLTKKRAKPAVPLGANYRLLDIPVSN             |
| <i>AtuGlgC</i> | (1)   | --MSEK-----RVQPLARDAMAYVLAGGRGSRLLKELTDRRAKPAVYFGGKARIIDFALSN           |
| <i>EcoGlgC</i> | (1)   | MVSLKNDHMLLARQPLKSVALLIAGGRGTRLKDLTNKRAKPAVHFGGKFRILDFALSN              |
| <b>CHIMERA</b> | (1)   | -----MPSKKVRKAVI PAAGLGTRFLPATKALAKEMLPITV-DKPTIQFIVEE                  |
| <i>SmuGalU</i> | (1)   | -----MPSKKVRKAVI PAAGLGTRFLPATKALAKEMLPITV-DKPTIQFIVEE                  |
| <i>HpyGalU</i> | (1)   | -----MIKKCLFPAAGYGRFLPITKTIPKEMLPITV-DKPLIQYAVEE                        |
| <i>CglGalU</i> | (1)   | -----MSLPIDEHVNNAVKTVVVPAAGLGTRFLPATKTVPKELLPVV-DTEGIELIAAE             |
|                |       | ..... ..... ..... ..... ..... ..... ..... ..... ..... ..... .....       |
|                |       | 70      80      90      100      110      120                           |
| <i>Solanum</i> | (53)  | CLNSNTISKIYVLTQFN SASLNRHLSRAYASNMGGYKNEG-----                          |
| <i>AtuGlgC</i> | (54)  | ALNSGIRRIQVATQYKAHSLIRHLQRGWDFFRPERNE-----                              |
| <i>EcoGlgC</i> | (61)  | CLNSGIRRMGVITQYQSHLTVQHIQRGWSFFNEEMNE-----                              |
| <b>CHIMERA</b> | (47)  | ALKSGIEDILLVVTGKSKRSIEDHFD-----SNFELEYNLEQKGTDLKLV                      |
| <i>SmuGalU</i> | (47)  | ALKSGIEDILLVVTGKSKRSIEDHFD-----SNFELEYNLEQKGTDLKLV                      |
| <i>HpyGalU</i> | (43)  | AMEAGCEVMAIVTGRNKRSLEDYFD-----TSYEIEHQIQGTNKENALKSI                     |
| <i>CglGalU</i> | (53)  | AAELGATRLAIIITAPNKAGVLAHFE-----RSSELEETLMERGKTDQVEII                    |
|                |       | ..... ..... ..... ..... ..... ..... ..... ..... ..... .....             |
|                |       | 130      140      150      160      170      180                        |
| <i>Solanum</i> | (92)  | -----FMEVLAQQSPENPHWFQG-----TADAVRQYLWLFEEHTVLE-----                    |
| <i>AtuGlgC</i> | (91)  | -----SFDILPASQQRVSETQWYEG-----TADAVYQNLDIIEPYAPEY-----                  |
| <i>EcoGlgC</i> | (98)  | -----FVDLLPAQQRMKGENWYRG-----TADAVTQNLDTIRRYKAEDLAGDH-----              |
| <b>CHIMERA</b> | (93)  | NDTTAIN-LHFIRQS-----HPRGLGDAVLQAK-----AFVGN-----                        |
| <i>SmuGalU</i> | (93)  | NDTTAIN-LHFIRQS-----HPRGLGDAVLQAK-----AFVGN-----                        |
| <i>HpyGalU</i> | (89)  | RNIIEKCCFSYVRQK-----QMKGLGHAILTGE-----ALIGNE-----                       |
| <i>CglGalU</i> | (99)  | RRAADLIKAVPVTQD-----KPLGLGHAVGLAE-----SVLD--DD                          |
|                |       | ..... ..... ..... ..... ..... ..... ..... ..... ..... .....             |
|                |       | 190      200      210      220      230      240                        |
| <i>Solanum</i> | (130) | ---YLILAGDHLIY-RMDYE-----KFIQAHRETDADITVAALPMDEKRATAFGLM                |
| <i>AtuGlgC</i> | (129) | ---MVLILAGDHIY-KMDYE-----YMLQOHVDSGADVTIGCLEVPRMEATGFGVM                |
| <i>EcoGlgC</i> | (136) | ---VVILAGDHIY-KQDYS-----RMLIDHVEKGARCTVACMPVPIEEASAFGVM                 |
| <b>CHIMERA</b> | (126) | --PFVVMLGDDLMD-----ITDDKAIPLTRQLMNDYEETHA-STIAVMEVPHEDVSAYGV            |
| <i>SmuGalU</i> | (126) | --PFVVMLGDDLMD-----ITDDKAIPLTRQLMNDYEETHA-STIAVMEVPHEDVSAYGV            |
| <i>HpyGalU</i> | (123) | --PFAVILADDLC-----ISHDHPSVLK-QMSTLYQKYQC-SIVAIEEVALEEVSKYGV             |
| <i>CglGalU</i> | (133) | EDVVAVMLPDDLVL-----LPT---GVME-RMAQVRAEFGG-SVLCAVEVSEADVSKYGI            |
|                |       | ..... ..... ..... ..... ..... ..... ..... ..... ..... .....             |
|                |       | 250      260      270      280      290      300                        |
| <i>Solanum</i> | (176) | KIDEE-----GRITIEFAEKFOGEQLQAMKVDTTILGLDDKRAKEM-----                     |
| <i>AtuGlgC</i> | (175) | HVNEK-----DEIDDFIEKF-----ADPPGIPGN                                      |
| <i>EcoGlgC</i> | (182) | AVDEN-----DKITIEFVEKF-----ANPPSPMPND                                    |
| <b>CHIMERA</b> | (178) | IAP--QGEQVS---GLYSVDTFVEKF-----AP-----                                  |
| <i>SmuGalU</i> | (178) | IAP--QGEQVS---GLYSVDTFVEKF-----AP-----                                  |
| <i>HpyGalU</i> | (173) | IRG---EWLEE---GVYEIKDMVEKF-----NQ-----                                  |
| <i>CglGalU</i> | (182) | FEI---EAD---TKSDSVKVKGMVEKF-----AI-----                                 |
|                |       | ..... ..... ..... ..... ..... ..... ..... ..... ..... .....             |
|                |       | 310      320      330      340      350      360                        |
| <i>Solanum</i> | (216) | --P-----FIASMEIYVVISKDVMLNLLRDKF-PGANDFGSEV-----IPGAT                   |

Figure S1. Cont.

|                |       |                                                                                                              |
|----------------|-------|--------------------------------------------------------------------------------------------------------------|
| <i>AtuGlgC</i> | (199) | EGF-----ALASMGIIYVFHTK-FLMEAVRRDAA---DPTS--SRDFGK-----DIIPYIV                                                |
| <i>EcoGlgC</i> | (206) | PSK-----SLASMGIIYVFDAD-PLYELLEEDDR---DENS--SHDFGK-----DLIPKIT                                                |
| <b>CHIMERA</b> | (201) | ---KEAPSNLAIIGRYLLT--PEIFTILET-----QEP-GAGNEVQLTDAIDTL                                                       |
| <i>SmuGalU</i> | (201) | ---KEAPSNLAIIGRYLLT--PEIFTILET-----QEP-GAGNEVQLTDAIDTL                                                       |
| <i>HpyGalU</i> | (195) | ---EDAPSNLAVIGRYILT--PDIFEILSE-----TKP-GKNNEIQITDALRTO                                                       |
| <i>CglGalU</i> | (206) | ---EDAPSRLAATGRYLLD--RKIFDALRR-----ITP-GAGGELQLTDAIDL                                                        |
|                |       | ..... ..... ..... ..... ..... ..... ..... ..... ..... ..... ..... .....                                      |
|                |       | 370                  380                  390                  400                  410                  420 |
| <i>Solanum</i> | (251) | SLGMRVQAYLY---DG--YWEDIGTIEAFYNANLGITK---KPV-----                                                            |
| <i>AtuGlgC</i> | (243) | EHG-KAVAHRFADSCVRSDFEHE-P--YWRDVGTIDAYWQANIDLTD---V-V-----                                                   |
| <i>EcoGlgC</i> | (250) | EAG-LAYAHPPPLSCVQSDPAE-P--YWRDVGTLEAYWKANLDLAS---V-V-----                                                    |
| <b>CHIMERA</b> | (244) | NKTQ-RVFAREF-----KGKRYDVGDKFGFMKTSIDYALK-----                                                                |
| <i>SmuGalU</i> | (244) | NKTQ-RVFAREF-----KGKRYDVGDKFGFMKTSIDYALK-----                                                                |
| <i>HpyGalU</i> | (238) | AKRK-RIIAYQF-----KGKRYDCGSVEGYIEASNAYYKKRL-----                                                              |
| <i>CglGalU</i> | (249) | IDEGHPVHIVH-----QGKRHDLGNPPGGYIPACVDFGLS-----HPVYGAQ                                                         |
|                |       | ..... ..... ..... ..... ..... ..... ..... ..... ..... ..... .....                                            |
|                |       | 430                  440                  450                  460                  470                  480 |
| <i>Solanum</i> | (291) | -----PDFSFYDRSAPIYTPRYLP                                                                                     |
| <i>AtuGlgC</i> | (288) | -----PDLDIYDKSWPIWTYAEITP                                                                                    |
| <i>EcoGlgC</i> | (295) | -----PELDMYDRNWPIRTYNESLP                                                                                    |
| <b>CHIMERA</b> | (280) | -----QVKEDLKAYIIELGKKLDQKSTQKNSDPELDMYDRNWPIRTYNESLP                                                         |
| <i>SmuGalU</i> | (280) | -----QVKEDLKAYIIELGKKLDQKSTQKNSD-----                                                                        |
| <i>HpyGalU</i> | (274) | -----                                                                                                        |
| <i>CglGalU</i> | (291) | LKDAIKQILAEHEAA-----                                                                                         |
|                |       | ..... ..... ..... ..... ..... ..... ..... ..... ..... .....                                                  |
|                |       | 490                  500                  510                  520                  530                  540 |
| <i>Solanum</i> | (311) | SSKML-----DADVTDSVIGEGCVIKNCKIHHSVVGRLRSCISEGAIEDSLLMG-ADY                                                   |
| <i>AtuGlgC</i> | (308) | PAKfVHDDEDRRG-SAVSSVVSGDCIISGAA LNRSLLFTGVRANSYSRLENAVVLPVSV---                                              |
| <i>EcoGlgC</i> | (315) | PAKfVQDRSGSHG-MTLNSLVSGGCVISGSVVVQSVLFSRVRVNSFCNIDSAVLLPEV---                                                |
| <b>CHIMERA</b> | (327) | PAKfVQDRSGSHG-MTLNSLVSGGCVISGSVVVQSVLFSRVRVNSFCNIDSAVLLPEV---                                                |
| <i>SmuGalU</i> | (307) | -----                                                                                                        |
| <i>HpyGalU</i> | (274) | -----                                                                                                        |
| <i>CglGalU</i> | (305) | -----                                                                                                        |
|                |       | ..... ..... ..... ..... ..... ..... ..... ..... ..... .....                                                  |
|                |       | 550                  560                  570                  580                  590                  600 |
| <i>Solanum</i> | (363) | YETDADRKLLAAKGSVPIGIGKNCHIKRAIIDKNARIGDNVKII-----EAARETD                                                     |
| <i>AtuGlgC</i> | (365) | -----KIGRHAQLSNVVIDHGVVPEGLIVGEDPELDAKRFRRTESGI                                                              |
| <i>EcoGlgC</i> | (372) | -----WVGRSCLRRRCVIDRACVPEGMVIGENAEEDARRFYRSEEGI                                                              |
| <b>CHIMERA</b> | (383) | -----WVGRSCLRRRCVIDRACVPEGMVIGENAEEDARRFYRSEEGI                                                              |
| <i>SmuGalU</i> | (307) | -----                                                                                                        |
| <i>HpyGalU</i> | (274) | -----                                                                                                        |
| <i>CglGalU</i> | (305) | -----                                                                                                        |
|                |       | ..... ..... ..... .....                                                                                      |
|                |       | 610                  620                                                                                     |
| <i>Solanum</i> | (420) | GYFIKSGIVTVIKDALIPSGIVI                                                                                      |
| <i>AtuGlgC</i> | (365) | CLITQSMIDKLDL-----                                                                                           |
| <i>EcoGlgC</i> | (415) | VLVTREMLRKLGHKQER-----                                                                                       |
| <b>CHIMERA</b> | (427) | VLVTREMLRKLGHKQER-----                                                                                       |
| <i>SmuGalU</i> | (307) | -----                                                                                                        |
| <i>HpyGalU</i> | (274) | -----                                                                                                        |
| <i>CglGalU</i> | (305) | -----                                                                                                        |

**Figure S2.** Alignment of chimeric enzyme sequence and templates used for homology modeling. (Ref.: 2pa4a, chain A of *C. glutamicum* UDP-Glc PPase; 3juja, chain A of *H. pylori* UDP-Glc PPase; 3BRK, *A. tumefaciens* ADP-Glc PPase; 1yp3a, chain A of potato tuber ADP-Glc PPase).

```

.....|.....|.....|.....|.....|.....|.....|.....|.....|.....|.....|
          10      20      30      40      50      60
2pa4a    ----- VKTVVVPAAAG LGTRFLPATK TVPKELLPVV -DTPGIELIA AEAAELGATR
3juja    -----M IKKCLFPAAG YGTRFLPITK TIPKEMPLIV -DKPLIQYAV EEAMEAGCEV
3BRK     -----QPLAR DAMAYVLGG RGSRLKELTD RRAKPAVYFG GKARIIDFAL SNALNSGIRR
1yp3a    QTCLDPDASR SVLGII LGGG AGTRLYPLTK KRAKPAVPLG ANYRLIDIPV SNCLNSNISK
Chimeric -----MPSKK VRKAVIPAAAG LGTRFLPATK ALAKEMPLIV -DKPTIQFIV EEALKSGIED

.....|.....|.....|.....|.....|.....|.....|.....|.....|.....|.....|
          70      80      90      100     110     120
2pa4a    LAIITAPNKA GVLAHFE--- -----R SSELEETLME RGKTDQVEII RRAADLIKAV
3juja    MAIVTGRNKR SLEDYFD--- -----T SYEIEHQIQG TNKENALKSI RNIEKCCFS
3BRK     IGVATQYKAH SLIRHLQRGW DFFRPERNE- -----SFD
1yp3a    IYVLTQFNSA SLNRHLSRAY -----EG- -----FVE
Chimeric ILVVTGKSKR SIEDHFD--- -----S NFELEYNLEQ KGKTDLLKLV NDTTAIN-LH

.....|.....|.....|.....|.....|.....|.....|.....|.....|.....|.....|
          130     140     150     160     170     180
2pa4a    PVTQD----- KPLG LGHAVGLAE- -----SVLD--DD EDVVAVMLPD
3juja    YVRQK----- QMKG LGHAILTGE- -----ALIGNE-- --PFAVILAD
3BRK     ILPAS----- -WYEG----- -TADAVYQ NIDIIEPYAP EY----- --MVI LAGD
1yp3a    VLAAQQSPEN PDWFQG----- -TADAVRQ YLWLFEEHTV LE----- --YLI LAGD
Chimeric FIRQS----- HPRG LGDAVLQAK- -----AFVGN-- --PFVVMLGD

.....|.....|.....|.....|.....|.....|.....|.....|.....|.....|.....|
          190     200     210     220     230     240
2pa4a    DLV-----L PT---GVME- RMAQVRAEFG G-SVLCAVEV SEADVSKYGI FEI----EAD
3juja    DLC-----I SHDHPSVLK- QMTSLYQKYQ C-SIVAIEEV ALEEVSKEYGV IRG----EWL
3BRK     HIY-KMDYE- -----YMLQQHVD SG ADVTIGCLEV PRMEATGFGV MHVNEK----
1yp3a    HLY-RMDYE- -----KFIQAHRETD ADITVAALPM DEKRATAFGL MKIDEE----
Chimeric DLMD-----I TDDKAIPLTR QLMNDYEETH A-STIAVMEV PHEDVSAYGV IAP---QGE

.....|.....|.....|.....|.....|.....|.....|.....|.....|.....|.....|
          250     260     270     280     290     300
2pa4a    --TKDSVVKK VKGMVEKP-- -----AI-----EDAPS
3juja    EE---GVYE IKDMVEKP-- -----NQ-----EDAPS
3BRK     -----DE IIDFIEKP-- -----ADPPGIP GNEGF-----
1yp3a    -----GR IIEFAEKPQG EQLQAMKVDT TILGLDDKRA KEM-----P-----
Chimeric VS---GLYS VDTFVEKP-- -----AP-----KEAPS

.....|.....|.....|.....|.....|.....|.....|.....|.....|.....|.....|
          310     320     330     340     350     360
2pa4a    RLAATGRYLL D--RKIFDAL RR-----ITPGA GGELQLTDAI DLLIDEGHPV
3juja    NLAVIGRYLL T--PDIFEIL SE-----TKPGK NNEIQITDAL RTQAKRK-RI
3BRK     ALASMGIVYF HTK-FLMEAV RRDA-----DI-----I PYIVEHG-KA
1yp3a    FIASMGIVVI SKD-VMLNLL RDKF-PGAND FGSEV-----I PGATSLGMRV
Chimeric NLAIIGRYLL T--PEIFTIL ET-----QEPGA GNEVQLTDAI DTLNKTO-RV

.....|.....|.....|.....|.....|.....|.....|.....|.....|.....|.....|
          370     380     390     400     410     420
2pa4a    HIVIH----- Q GKRHDLGNPG GYIPACVDFG LS-----HPV YGAQLKDAIK
3juja    IAYQF----- K GKRYDCGSVE GYIEASNAAY KKRL-----
3BRK     VAHREFADSCV RSDFEHE-P- -YWRDVGTD AYWQANIDL T D---V-V---
1yp3a    QAYLY----- DG- -YWEDIGTIE AFYNANLGIT K---KPV---
Chimeric FAREF----- K GKRYDVGDKF GFMKTSIDYA LKHP-----
.....|.....|.....|.....|.....|.....|.....|.....|.....|.....|.....|

```

Figure S2. Cont.

```

                430      440      450      460      470      480
2pa4a      QILAEHEAA- -----
3juja      -----
3BRK      -----PDLI IYDKSWPIWT YAEITPPAKF
1yp3a      -----PDFS FYDRSAPIYT QPRYLPPSKM
Chimeric   -----Q VKEDLKAYII ELGKKLDQKS TQKNSDPELD MYDRNWPIRT YNESLPPAKF

                .....|.....| .....|.....| .....|.....| .....|.....| .....|.....|
                490      500      510      520      530      540
2pa4a      -----
3juja      -----
3BRK      VHDDDDRGG- -SAVSSVVG DCIISGAALN RSLLEFTGVRA NSYSRLENVA VLPSV-----
1yp3a      L-----D ADVTDSVIGE GCVIKNCKIH HSVVGLRSCI SEGAIIEDSL LMG--ADYYE
Chimeric   VQDRSGSHG- -MTLNSLVSG GCVISGSVVV QSVLFSRVRV NSFCNIDSAV LLPEV-----

                .....|.....| .....|.....| .....|.....| .....|.....| .....|.....|
                550      560      570      580      590      600
2pa4a      -----
3juja      -----
3BRK      -----KIGR HAQLSNVVID HGVVIPEGLI VGEDPELDAK RFRRTESGIC
1yp3a      TDADRKLLAA KGSVPIGIGK NCHIKRAIID KNARIGDNVK II-----
Chimeric   -----WVGR SCRLRRCVID RACVIPEGMV IGENAEEDAR RFYRSEEGIV

                .....|.....| .....|.....| .....|.....| .....|.....| .....|.....|
                610      620      630      640      650
2pa4a      -----
3juja      -----
3BRK      LITQSMIDKL -----
1yp3a      -----NKDN VQEAARETDG YFIKSGIVTV IKDALIPSGI II
Chimeric   LVTREMLRKL GHKQER-----

```
